# Supplementary material
Source: PubMed Central journal article supplement (PMC3668093)
Supplement: NIHMS463136-supplement-Supplementary_Material.pdf [file NIHMS463136-supplement-Supplementary_Material.pdf]

## Supplementary Materials

### Nucleotide-resolution analysis of *TMPRSS2* and *ERG* rearrangements in prostate cancer

Christopher Weier, Michael C. Haffner, Timothy Mosbrugger, David M. Esopi, Jessica Hicks,

Qizhi Zheng, Helen Fedor, William B. Isaacs, Angelo M. De Marzo, William G. Nelson,

Srinivasan Yegnasubramanian

#### Table of Contents

|                         | <u>Page</u> |
|-------------------------|-------------|
| Supplementary Methods   | 2           |
| Supplementary Figure 1  | 3           |
| Supplementary Figure 2  | 4           |
| Supplementary Figure 3  | 5           |
| Supplementary Figure 4  | 6           |
| Supplementary Figure 5  | 7           |
| Supplementary Figure 6  | 8           |
| Supplementary Figure 7  | 9           |
| Supplementary Figure 8  | 10          |
| Supplementary Figure 9  | 11          |
| Supplementary Figure 10 | 12          |
| Supplementary Table 1   | 13          |
| Supplementary Table 2   | 14          |
| Supplementary Table 3   | 15          |
| Supplementary Table 4   | 16          |

#### **Additional Supplementary Material not included in this PDF:**

Supplementary File containing chromosomal coordinates of RNA Baits used in geBACS.

## **SUPPLEMENTARY METHODS**

### **PCR reactions for validation and case-specific breakpoint assignment**

PCR reactions consisted of 40 µl reactions containing 50 ng of DNA, 1× Platinum Taq buffer (Invitrogen, Carlsbad, CA), 1.5 U Platinum Taq polymerase (Invitrogen), 250 µM each dNTPs, 1.5 mM MgCl<sub>2</sub>, 0.25 µg/µl BSA, 2 µl dimethyl sulfoxide, 400 nM each forward and reverse primers. A touchdown PCR approach was utilized as follows: 95°C for 3 min, 4 cycles of denaturing at 94°C for 30 s, annealing at 70°C for 30 s and extension at 72°C for 45 s, repeating with successive annealing temperatures of 68°C, 65°C, and 60°C for 4 cycles each and finally 36 cycles at an annealing temperature of 55°C, followed by a 7 min extension step at 72°C.

A

Case 45

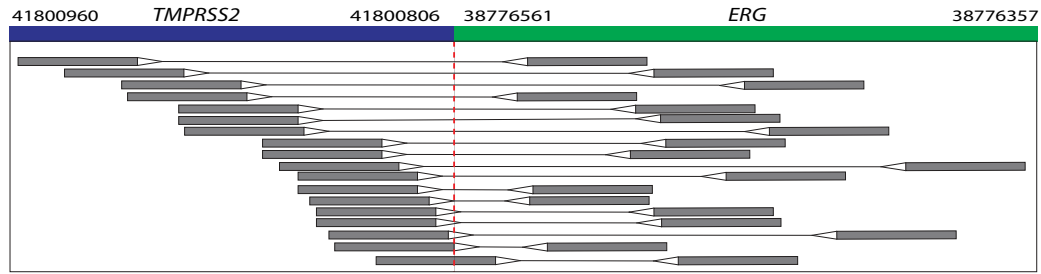

Case 66

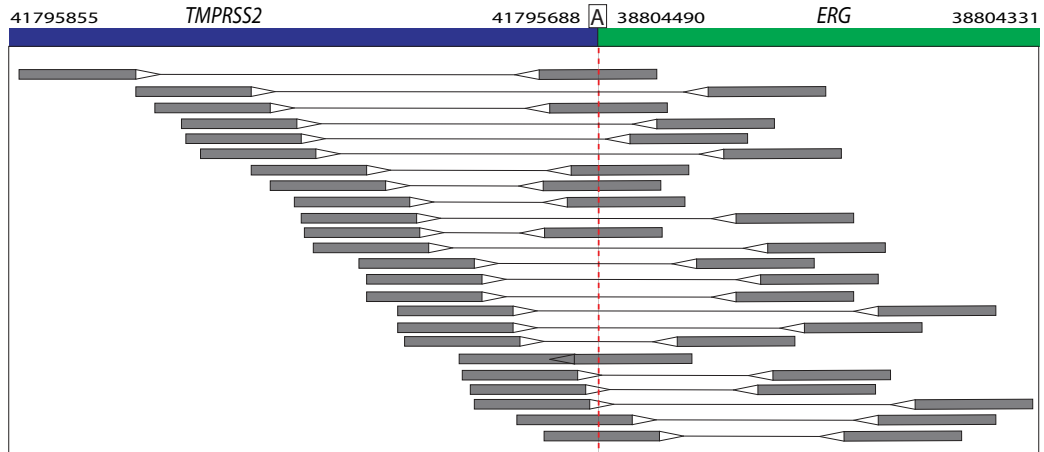

Case 77

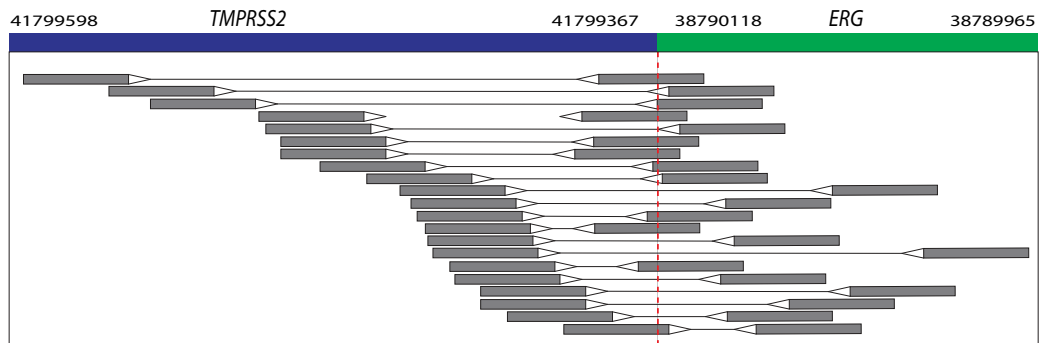

B

Characteristics of rearrangement junctions identified in reference samples.\*

| Reference Case # | Junctions          | Gene 1         | Gene 2         | Orientation | <sup>A</sup> Microhomology | <sup>B</sup> Reads | <sup>C</sup> Junction Reads |
|------------------|--------------------|----------------|----------------|-------------|----------------------------|--------------------|-----------------------------|
| Case 45          | <i>TMPRSS2-ERG</i> | chr21:41800806 | chr21:38776561 | s/s         | -                          | 18                 | 5                           |
| Case 66          | <i>TMPRSS2-ERG</i> | chr21:41795687 | chr21:38804491 | s/s         | A                          | 24                 | 11                          |
| Case 77          | <i>TMPRSS2-ERG</i> | chr21:41799367 | chr21:38790118 | s/s         | -                          | 21                 | 12                          |

\*, Conventions are same as for Supplementary Table 2.

A. Bases at the junction that are shared by both genes in the rearrangement.

B. Number of paired-end reads flanking or directly overlapping the rearrangement junction.

C. Number of reads directly overlapping the rearrangement junction.

**Supplementary Figure 1. Detection of rearrangement junctions in reference samples.**

(A) Paired-end read distribution surrounding 3 known *TMPRSS2-ERG* rearrangements from 3 reference samples allowing assessment of effectiveness of the geBACS strategy. The position of the breakpoint is indicated by the red line and by the Chr21 positions of the *TMPRSS2* and *ERG* breakpoints at the top of each panel. (B) Characteristics of *TMPRSS2-ERG* breakpoints of reference samples.

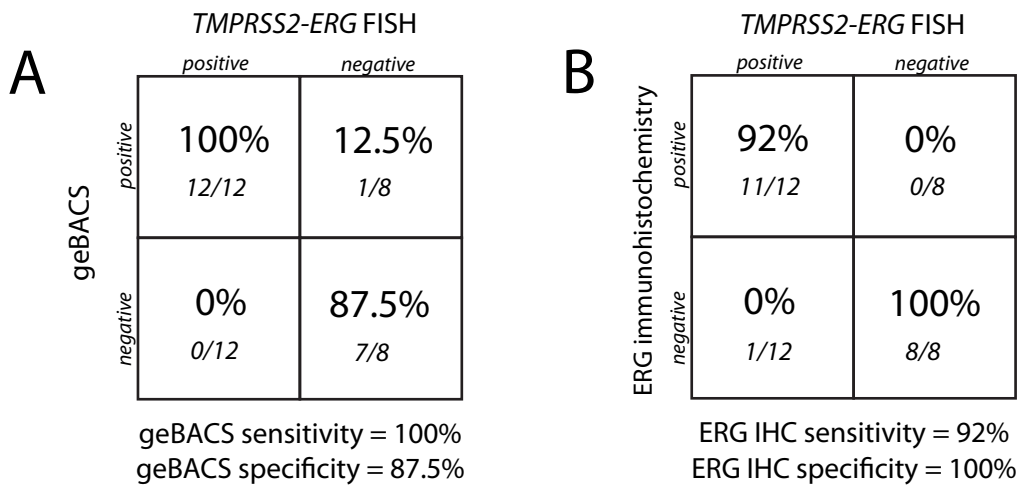

**C**

| Patient Bank # | Junctions                                                                       | ERG Stain | FISH    |
|----------------|---------------------------------------------------------------------------------|-----------|---------|
| 4              | TMPRSS2-ERG                                                                     | positive  | D       |
| 372            | TMPRSS2-ERG<br>SLC45A3-ERG                                                      | negative  | N       |
| 535            | TMPRSS2-ERG                                                                     | positive  | D       |
| 652            | TMPRSS2-ERG<br>ERG-ERG                                                          | positive  | T       |
| 675            | TMPRSS2-ERG                                                                     | positive  | D       |
| 682            | TMPRSS2-ERG                                                                     | positive  | D       |
| 808            | TMPRSS2-ERG<br>TMPRSS2-ERG                                                      | positive  | T       |
| 814            | TMPRSS2-ERG                                                                     | positive  | T       |
| 816            | TMPRSS2-ERG<br>TMPRSS2-TMPRSS2                                                  | positive  | T       |
| 981            | TMPRSS2-ERG                                                                     | positive  | T       |
| 989            | FAM177A-ERG                                                                     | positive  | D       |
| 995            | TMPRSS2-ERG<br>ERG-ERG<br>TMPRSS2-TMPRSS2<br>TMPRSS2-TMPRSS2<br>TMPRSS2-TMPRSS2 | positive  | T       |
| 1273           | ELK4-ERG                                                                        | negative  | T, ERG* |
| 170            | -                                                                               | negative  | N       |
| 178            | -                                                                               | negative  | N       |
| 700            | -                                                                               | negative  | N       |
| 913            | -                                                                               | negative  | N       |
| 994            | -                                                                               | negative  | N       |
| 1048           | -                                                                               | negative  | N       |
| 1508           | -                                                                               | negative  | N       |

Rearrangement status by FISH; rearrangement with deletion (D), rearrangement with translocation (T), no rearrangement (N). \*, Case 1273 showed translocation only of the 3' ERG probe.

**Supplementary Figure 2. Sensitivity and specificity determination of geBACS by FISH.**

(A) Specificity and sensitivity of the geBACS pipeline in identifying TMPRSS2-ERG rearrangements, determined by using TMPRSS2-ERG FISH. (B) Correlation between ERG IHC and TMPRSS2-ERG FISH. (C) Table summarizing IHC and FISH data.

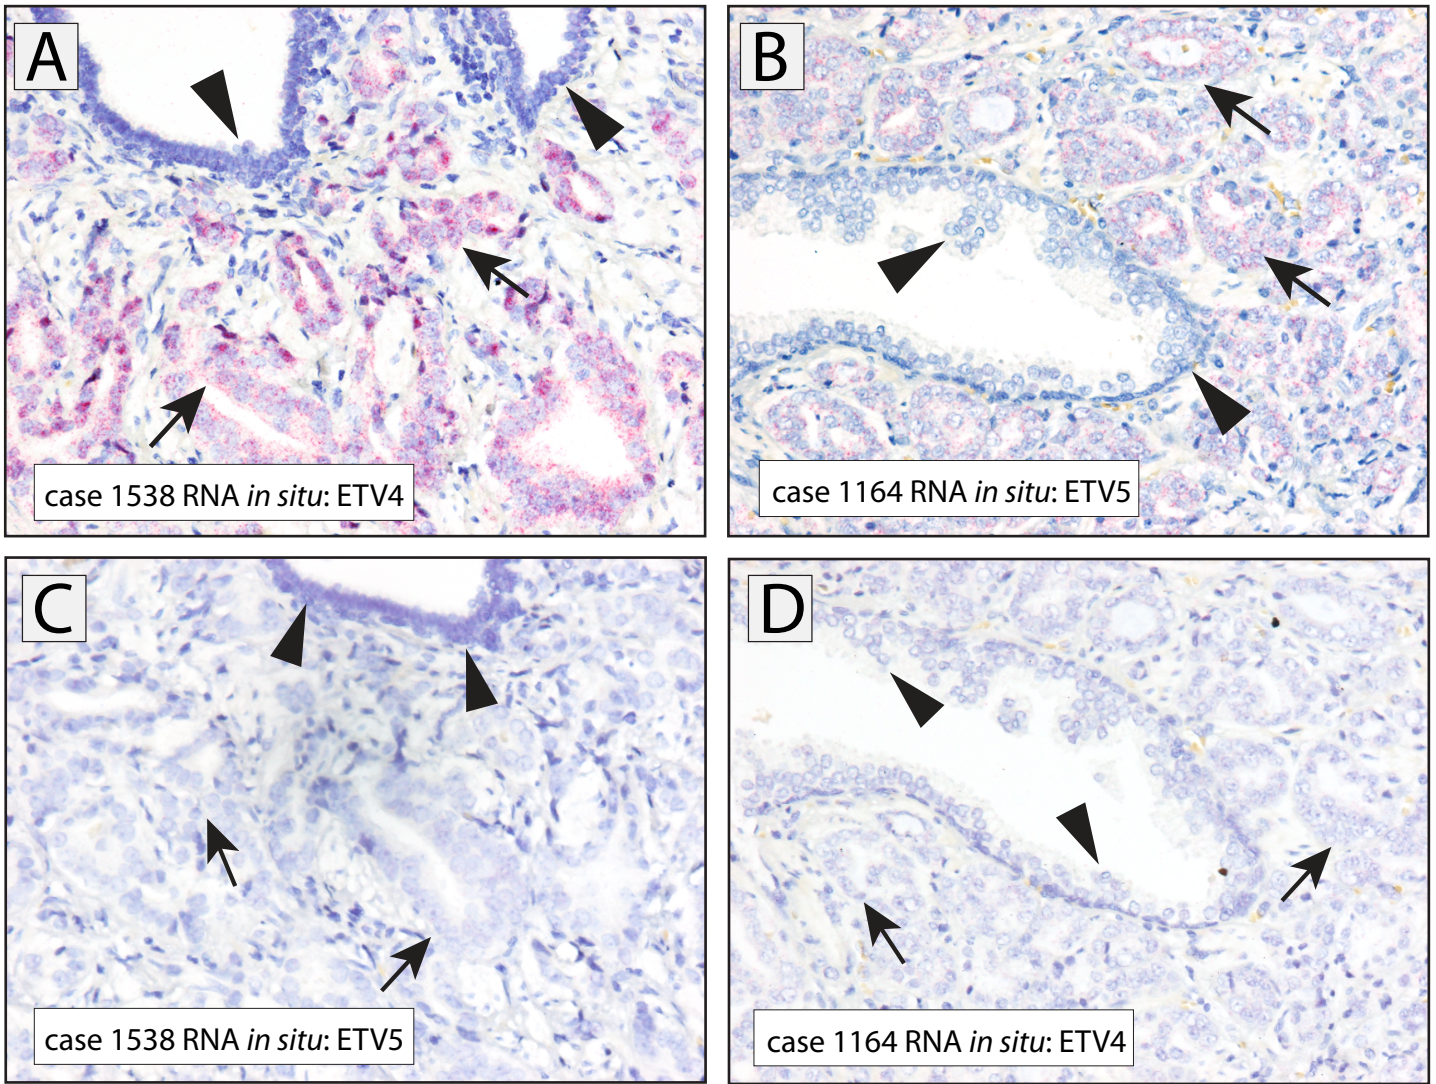

**Supplementary Figure 3. In situ RNA detection of ETV4 and ETV5 in cases harboring TMPRSS2-ETV4 and TMPRSS2-ETV5 rearrangements.** Case 1538 with geBACS-confirmed ETV4 rearrangement shows positive reactivity for ETV4 expression in neoplastic cells (arrows) (A), but no reactivity with ETV5 specific probes (C). Case 1164 with geBACS confirmed TMPRSS2-ETV5 rearrangement shows positive reactivity for ETV5 expression in tumor cells (arrows) (B), but no reactivity with ETV4 probes (D). Arrows indicate representative prostate cancer cells, and Arrowheads indicate representative normal prostate epithelial cells.

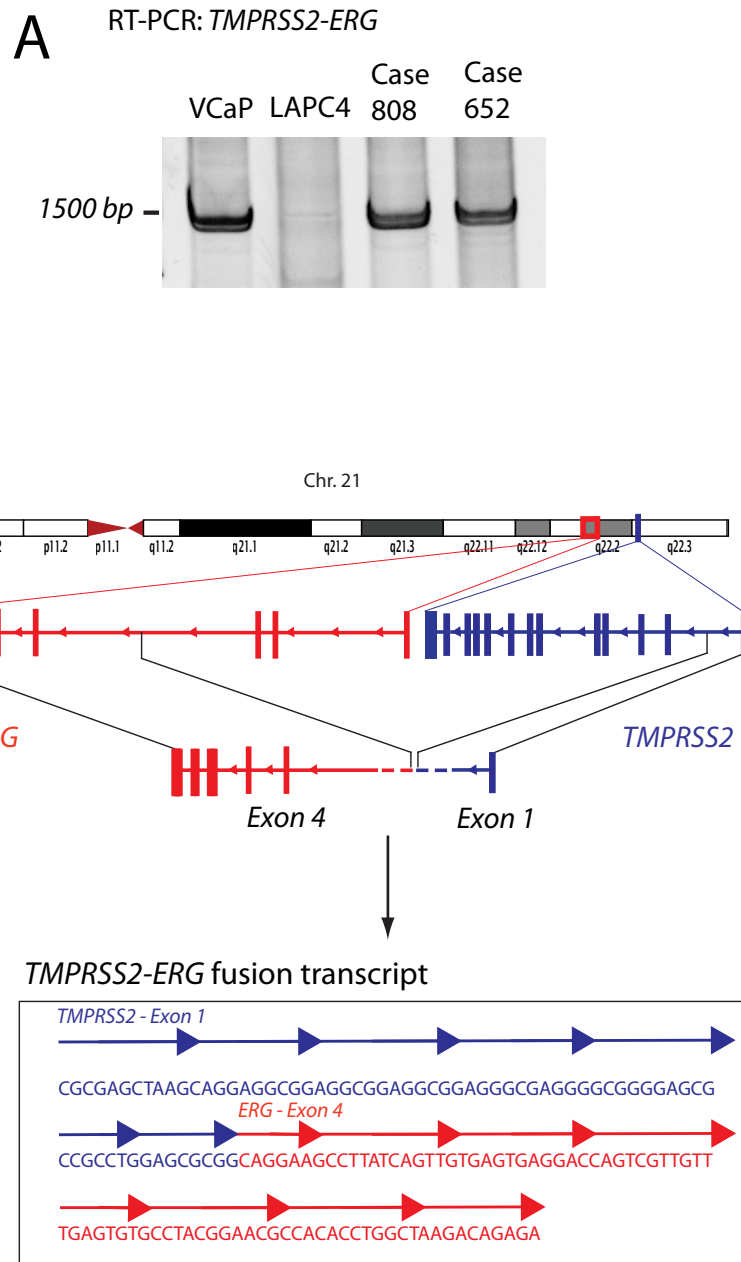

**Supplementary Figure 4. The most common *TMPRSS2-ERG* rearrangement involves the first intron of *TMPRSS2* and the third intron of *ERG* resulting in an exon 1 – exon 4 *TMPRSS2-ERG* fusion transcript.** (A) RT-PCR showing the expected exon 1 – exon 4 fusion previously noted in the VCaP cell line. Lane 2 shows no amplification of the transcript from the rearrangement negative LAPC4 cell line while lanes 3 and 4 show a similar exon 1 – exon 4 transcript in Cases 808 and 652 respectively, in which geBACS identified rearrangements occurring in intron 1 of *TMPRSS2* and intron 3 or *ERG*. Bands were excised and sequenced to verify the expected rearrangement transcript. (B) Detailed schematic showing the configuration of the most common *TMPRSS2-ERG* rearrangement sites identified by geBACS and the structure of the expected fusion transcript sequence.

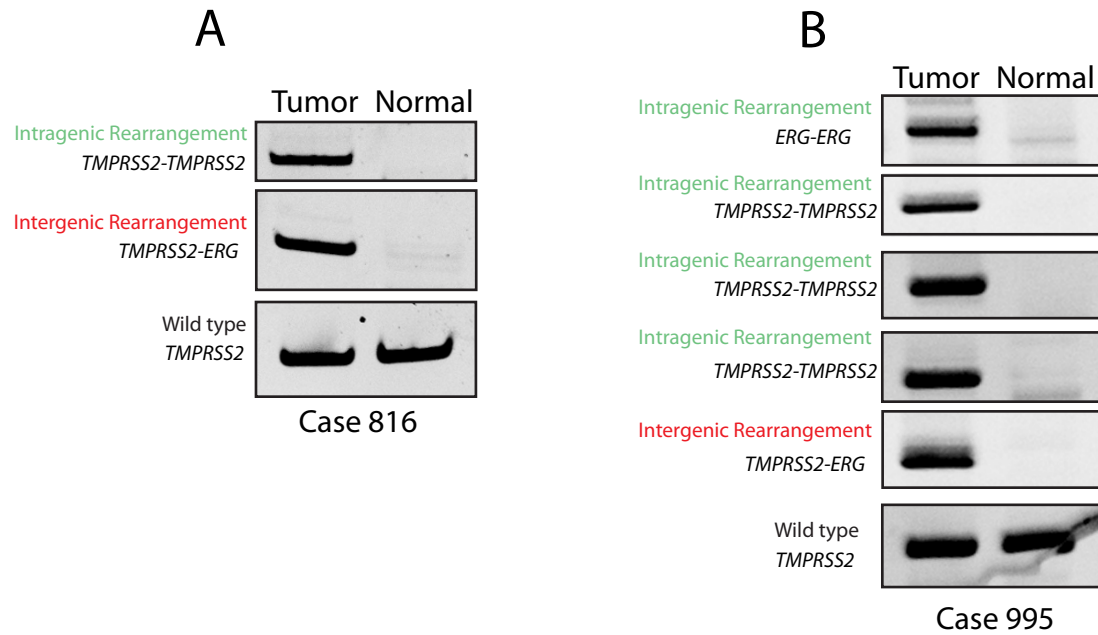

**Supplementary Figure 5. Inter- and Intra- genic rearrangements in TMPRSS2 and ERG are only detected in tumor, and not in normal adjacent tissue.** All inter- and intra- genic rearrangements identified by geBACS for case 816 (A) and case 995 (B) were detected by PCR using primers flanking the rearrangement breakpoint only in tumor, but not adjacent normal tissues. (A,B) Primers targeting a TMPRSS2 sequence not involved in rearrangement (Wild type TMPRSS2) were used as an input control for the PCR reactions.

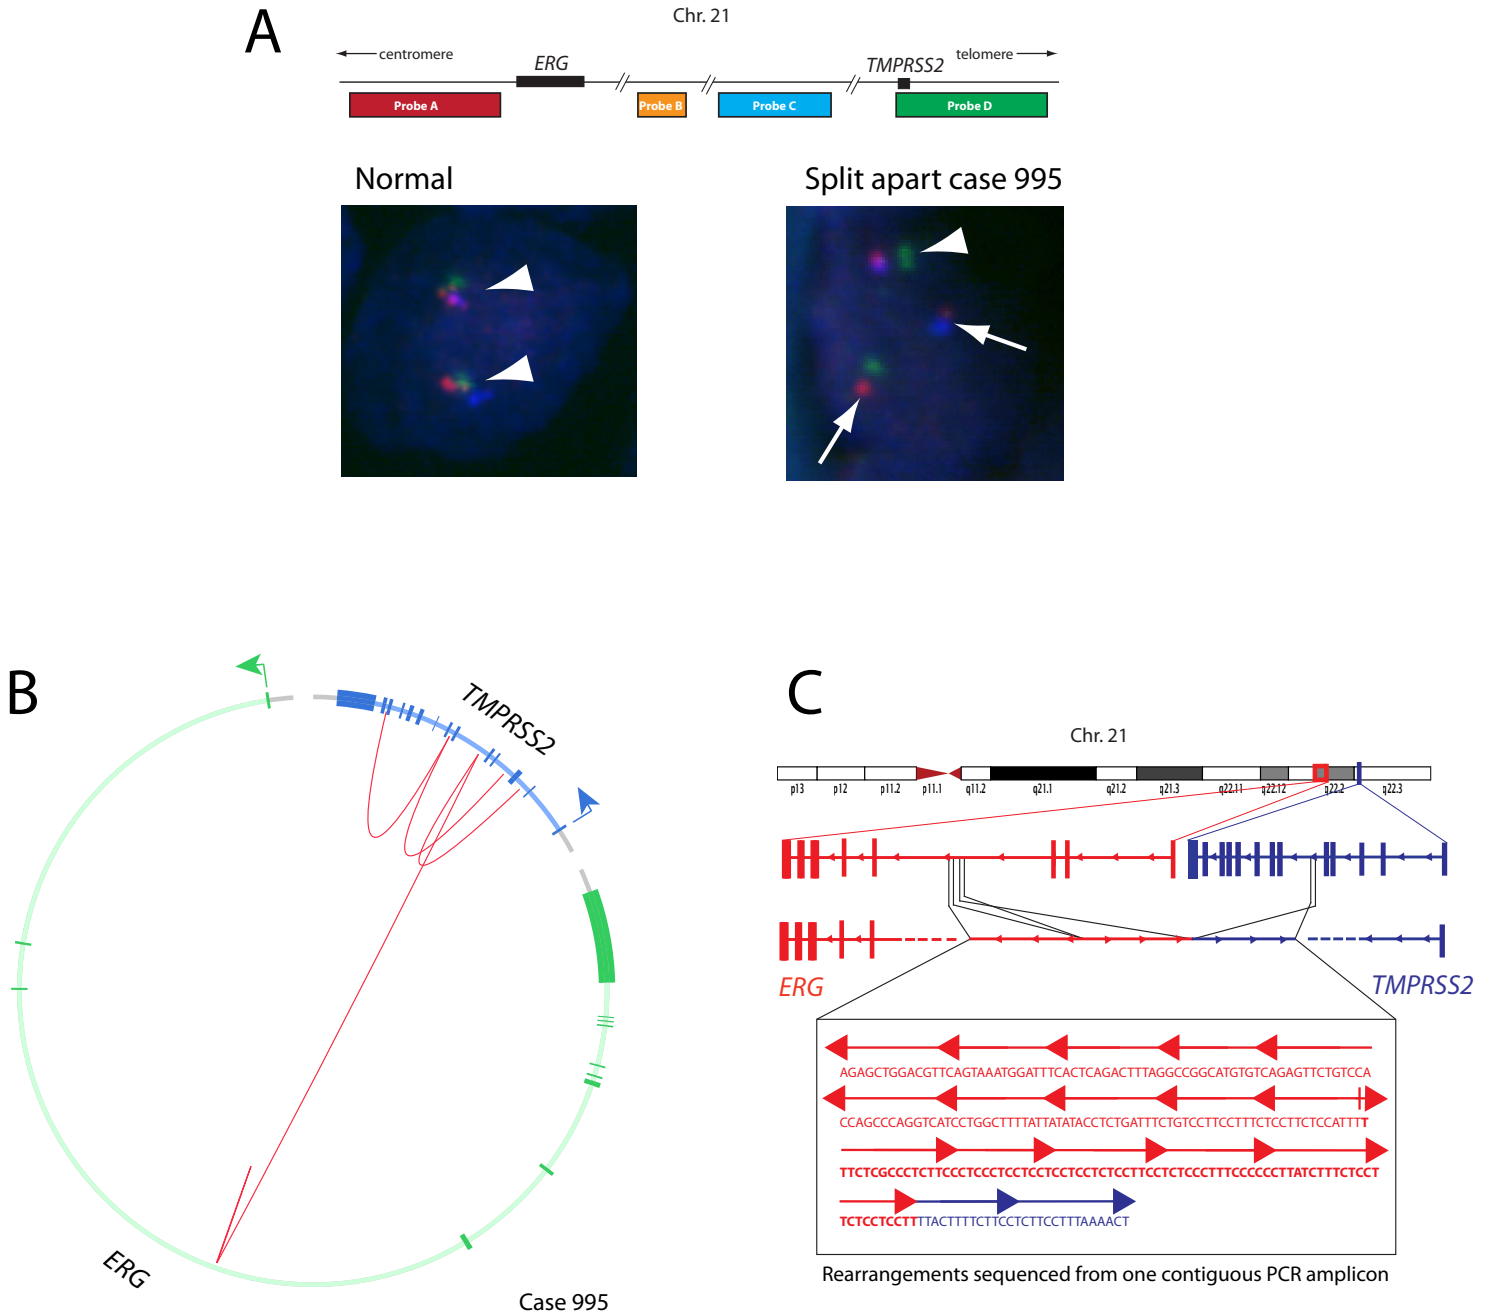

**Supplementary Figure 6. Detailed characterization of rearrangements in Case 995.** (A) Mono-allelic rearrangement associated with translocation by FISH. White arrowheads indicate normal alleles, white arrows indicate rearranged alleles. (B) Circos plot depicting complex interand intra-genic rearrangements involving *TMPRSS2* and *ERG*. (C) A schematic representing the location and orientation of a complex rearrangement in case 995 involving inversion of an *ERG* segment, inversion of a *TMPRSS2* segment, and the rearrangement of *TMPRSS2* with *ERG* is shown. A PCR amplicon spanning multiple contiguous complex rearrangement junctions was sequenced and used to generate this schematic (see Supplementary Table 3 for the PCR primers).



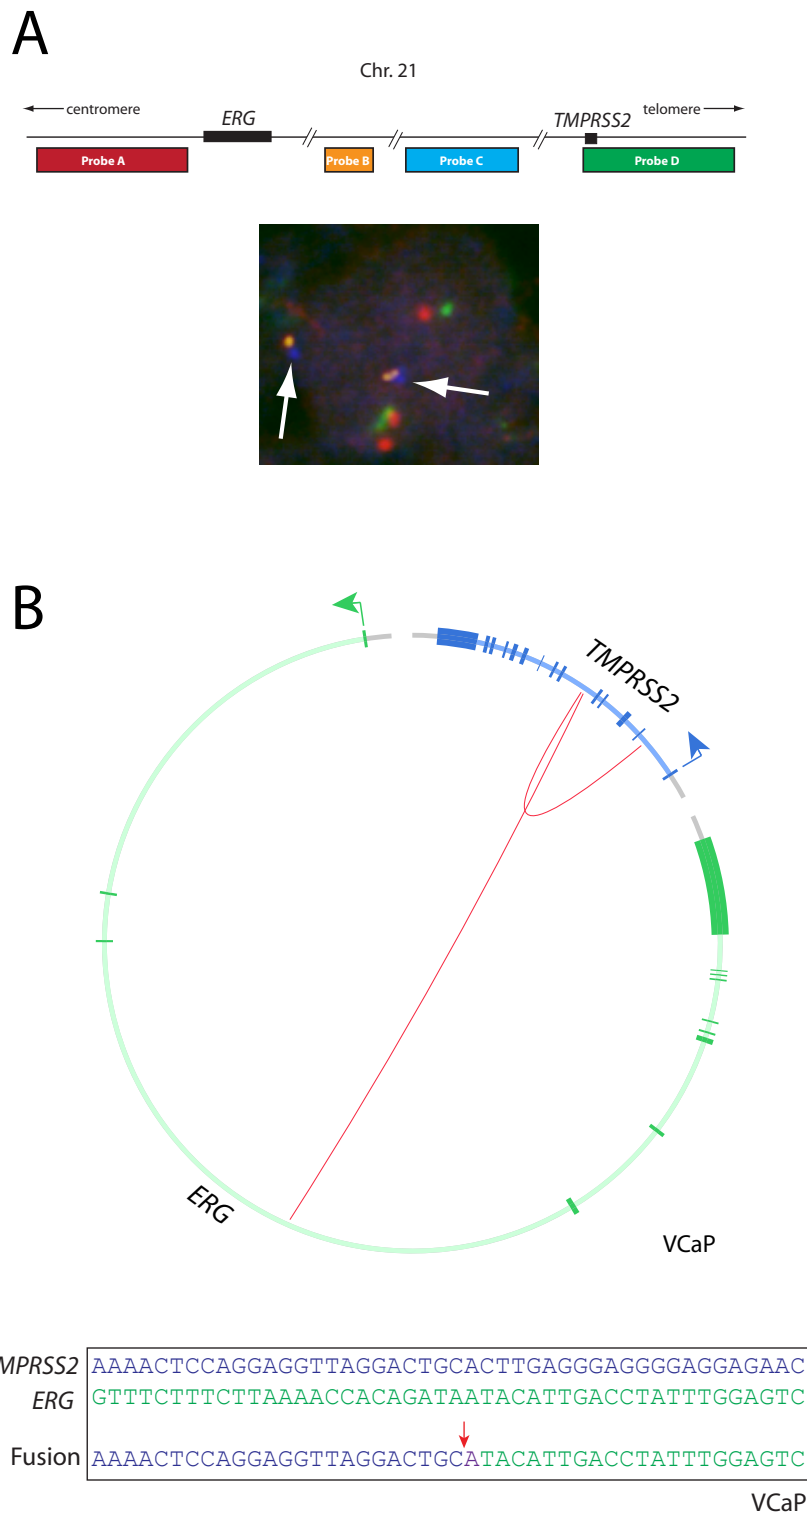

**Supplementary Figure 7. Detailed characterization of rearrangements in VCaP cell line.**

(A). *TMPRSS2-ERG* FISH of VCaP cells confirmed the presence of a rearrangement, and revealed a bi-allelic rearrangement for *TMPRSS2-ERG* associated with translocation of intervening sequences. (B) Circos plot depicting inter- and intra-genic rearrangements in VCaP. (C) Genomic sequence of the *TMPRSS2-ERG* fusion in VCaP, as identified by geBACS and confirmed by PCR and Sanger sequencing.

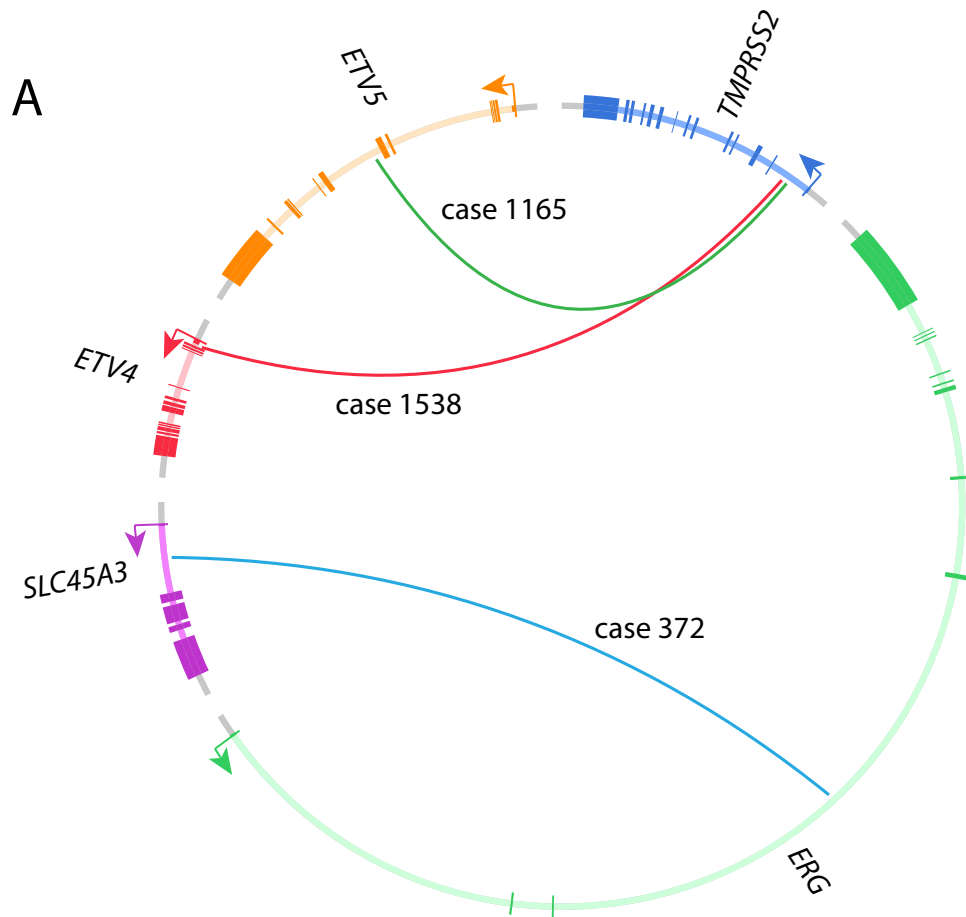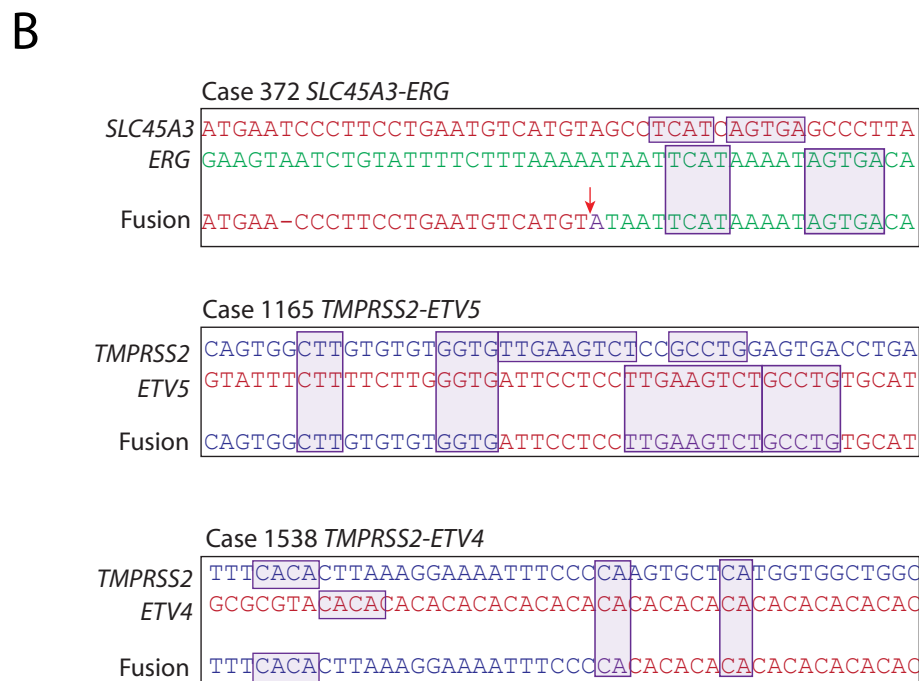

**Supplementary Figure 8. Genomic rearrangements involving *TMPRSS2*, *SLC45A3*, *ERG*, *ETV4* and *ETV5*.** (A) Circos plots showing architecture of genomic rearrangements in cases harboring *TMPRSS2-ETV4* (case 1538), *TMPRSS2-ETV5* (case 1165) and *SLC45A3-ERG* (case 372) fusions. (B) Nucleotide resolution of breakpoint sequence of the above cases. Sequences showing flanking microhomologies are highlighted in boxes. Note that case 1165 shows extensive microhomology overlapping and flanking the fusion breakpoint.

case 70

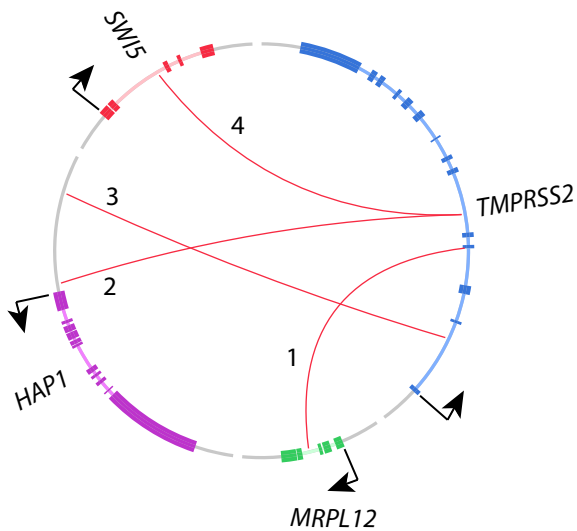

```

1 CCTCCTCTCCAGAGACTAAGCAATCCAGTTTACACAACAGGCTCTACAGT
2 GCCAGTGCATTAGGGCAGCGCTGACTGGTTTCTGTAAAGCCCTCGC
3 GAAGCCGGCCCCACTCTACTTCAGGATACTTAACACAGGTGAGCCCCACC
4 CCCCTCTCTAAGGGCCATCCTTGTTG AGGACGCTGAGGCCaGAGAATTA
    
```

case 558

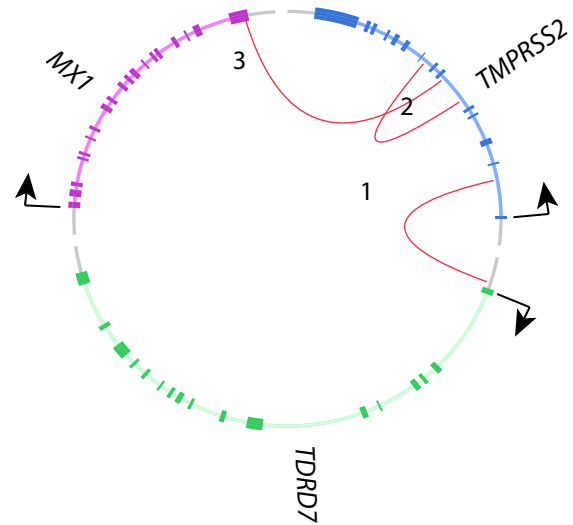

```

1 GTAAAATACATATAGTGTCTAGATATGAGTATTGATTCTTCACTCCTTT
2 TACAATAATAGGTCCTTCTGACACCT/AATAAGTTTTAAAGGAAGAGGAA
3 CTAGAAACTGACACATGCTGAACATaaagGAGCATAAGGTCTTCAGCACT
    
```

case 808

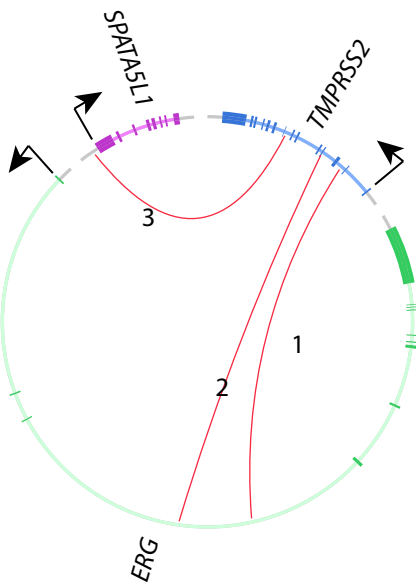

```

1 AGAAGGGGAAGATGTGGGCTGGTGGGGCCCTGCAAAACATCACAAGAGCACT
2 GAGGAAGGTCCCCAGGGTCAAGGTGAGATGTTTAATACCTACAAATACAG
3 TATCTACGTTATTAAGACAACCTGCCTGACGCTCAGTGAAATAATTCAGGT
    
```

case 816

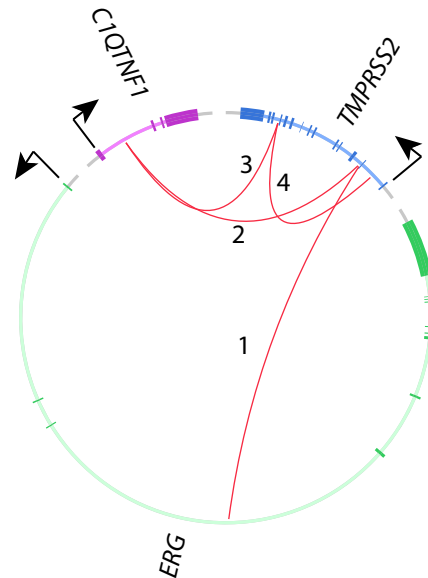

```

1 ACACAGCTGCCAGGTGAGTCGCAAGAGCAGACTGAGATAGGCTTCCCGA
2 GTGGCTCGTAGCCACTGTACTGACTCAGGAATTTTCAGGGACAAACCTGC
3 AAATGTTTAAGTCAGTACAGTGGCcTGAGGACGGGCATCCTGGACCCATG
4 TGGACCCATGGTGGCCACATCTAAGC/AAATGAGTAAGATGAAATTTAGCA
    
```

**Supplementary Figure 9. Cases showing complex genomic rearrangements involving TMPRSS2 and ERG.** Representative circos plots of various cases exhibiting complex intra- and inter-chromosomal rearrangements involving TMPRSS2 or ERG. The sequences of the breakpoint for the junctions from each case are shown below.

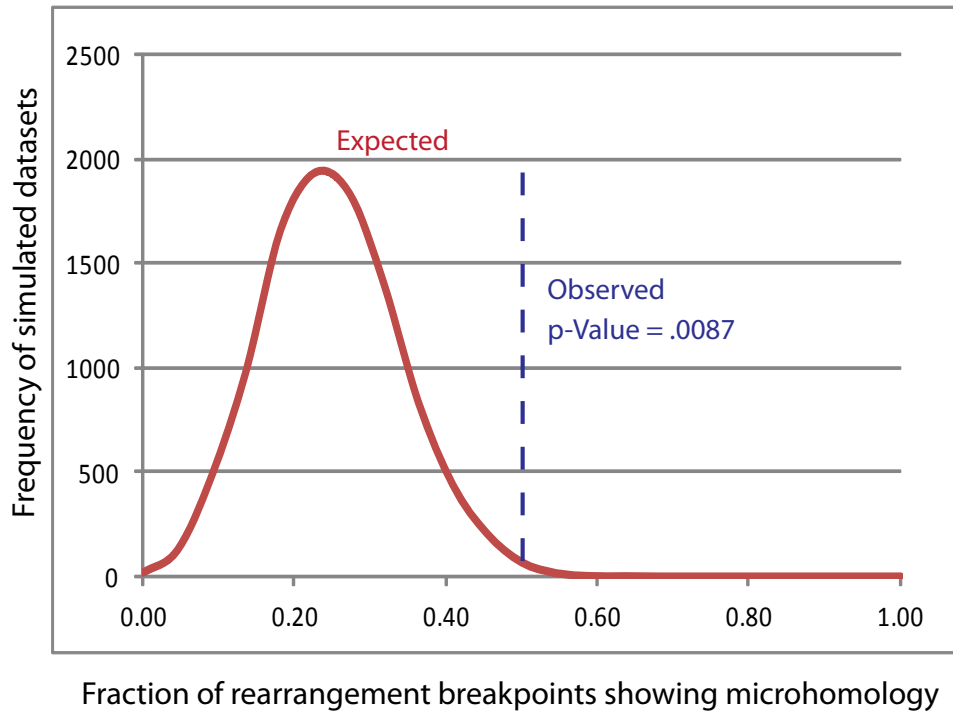

**Supplementary Figure 10. Strong enrichment of microhomologies at breakpoint junctions.**

Groups of 22 randomly generated rearrangements between the introns of Tmprss2 and ERG were simulated 10,000 times. The red distribution shows the fraction of rearrangements in each simulated dataset displaying microhomologies (1+ nucleotides) at the junction. The dashed blue line indicates the fraction of rearrangement breakpoints with microhomologies in our observed dataset, and shows that our observed dataset is significantly enriched for microhomology compared to what would be expected by random chance ( $p = 0.0087$ ).

**Supplementary Table 1: Clinical and pathological characteristics of study samples**

|                                     |                |
|-------------------------------------|----------------|
| <b>Median Age (range)</b>           | 61 (34-72)     |
| <b>Ethnicity</b>                    | <b>N (%)</b>   |
| Caucasian                           | 74 (89.2)      |
| African American                    | 6 (7.2)        |
| Hispanic                            | 1 (1.2)        |
| Other                               | 1 (1.2)        |
| N/A                                 | 1 (1.2)        |
| <b>Gleason Sum*</b>                 | <b>N (%)</b>   |
| 5                                   | 1 (1.3)        |
| 6                                   | 11 (14.1)      |
| 7                                   | 43 (55.1)      |
| 8                                   | 11 (14.1)      |
| 9                                   | 12 (15.4)      |
| <b>Surgical Margins*</b>            | <b>N (%)</b>   |
| Positive                            | 28 (36)        |
| Negative                            | 50 (64)        |
| <b>Median Gland Weight (range)*</b> | 55.05 (27-155) |
| <b>TNM***</b>                       | <b>N (%)</b>   |
| T1                                  | 0 (0)          |
| T2                                  | 6 (7.7)        |
| T3                                  | 71 (91)        |
| T4                                  | 0 (0)          |
| TX                                  | 1 (1.3)        |
| N0                                  | 62 (79.5)      |
| N1                                  | 16 (20.5)      |

\* Data based on 78 specimens; surgical data unavailable for 5 specimens

\*\*Distant metastases were not assessed at time of prostatectomy

Supplementary Table 2: Detailed clinical and pathological characteristics of cohort

| Patient Bank # | Age | Ethnicity | MarginsPositive | GleasonSum | Primary | Nodes | Tumor Cellularity % |
|----------------|-----|-----------|-----------------|------------|---------|-------|---------------------|
| 4              | 59  | W         | Negative        | 7          | T3      | N0    | 80                  |
| 10             | 62  | W         | Negative        | 7          | T3      | N1    | NA                  |
| 13             | 64  | W         | Negative        | 5          | T3      | N0    | NA                  |
| 70             | 67  | W         | Positive        | 6          | T3      | N0    | NA                  |
| 82             | 71  | W         | Negative        | 7          | T3      | N0    | NA                  |
| 96             | 48  | W         | Negative        | 9          | T3      | N1    | NA                  |
| 116            | 64  | W         | Negative        | 6          | T3      | N0    | NA                  |
| 134            | 60  | W         | Negative        | 6          | T3      | N0    | NA                  |
| 144            | 59  | W         | Negative        | 7          | T3      | N0    | NA                  |
| 146            | 63  | W         | Negative        | 7          | T3      | N0    | NA                  |
| 178            | 51  | W         | Negative        | 7          | T3      | N0    | NA                  |
| 179            | 63  | W         | Negative        | 9          | T3      | N1    | NA                  |
| 199            | 70  | W         | Negative        | 7          | T3      | N1    | NA                  |
| 202            | 58  | W         | Negative        | 6          | T3      | N1    | NA                  |
| 206            | 57  | W         | Negative        | 9          | T3      | N0    | NA                  |
| 214            | 69  | W         | Positive        | 7          | T3      | N0    | 65                  |
| 219            | 66  | W         | Positive        | 8          | T3      | N0    | NA                  |
| 243            | 52  | W         | Negative        | 7          | T3      | N1    | NA                  |
| 270            | 61  | W         | Negative        | 7          | T3      | N0    | 80                  |
| 327            | 62  | W         | Positive        | 7          | T3      | N0    | 75                  |
| 341            | 66  | W         | Negative        | 7          | T2      | N0    | 80                  |
| 353            | 65  | W         | Negative        | 6          | T3      | N0    | 85                  |
| 357            | 57  | W         | Positive        | 7          | T3      | N0    | 70                  |
| 358            | 57  | W         | Negative        | 7          | T3      | N1    | 65                  |
| 362            | 55  | W         | Negative        | 9          | T3      | N0    | 70                  |
| 372            | 68  | W         | Positive        | 7          | T3      | N0    | 80                  |
| 388            | 72  | W         | Negative        | 7          | T3      | N0    | 70                  |
| 460            | 68  | W         | Negative        | 9          | T3      | N0    | 75                  |
| 535            | 54  | W         | Negative        | 8          | T3      | N0    | 70                  |
| 541            | 67  | W         | Negative        | 8          | T3      | N0    | 65                  |
| 558            | 62  | W         | Negative        | 6          | T3      | N0    | NA                  |
| 580            | 52  | W         | Negative        | 7          | T3      | N0    | NA                  |
| 594            | 54  | W         | Positive        | 6          | T3      | N0    | NA                  |
| 652            | 66  | W         | Positive        | 7          | T3      | N1    | 85                  |
| 667            | 65  | W         | Positive        | 7          | T3      | N1    | 75                  |
| 675            | 57  | W         | Negative        | 6          | T3      | N0    | 70                  |
| 682            | 56  | W         | Positive        | 7          | T3      | N0    | 65                  |
| 700            | 66  | W         | Negative        | 7          | T3      | N1    | 75                  |
| 731            | 52  | W         | Negative        | 9          | T3      | N0    | NA                  |
| 733            | 67  | W         | Positive        | 9          | T3      | N0    | 65                  |
| 735            | 62  | B         | Positive        | 9          | T3      | N0    | 90                  |
| 738            | 55  | W         | Negative        | 7          | T3      | N0    | 70                  |
| 741            | 66  | W         | Negative        | 9          | T2      | N0    | NA                  |
| 759            | 68  | W         | Positive        | 7          | TX      | N0    | NA                  |
| 774            | 71  | W         | Negative        | 7          | T3      | N0    | NA                  |
| 780            | 53  | W         | Negative        | 8          | T3      | N1    | NA                  |
| 782            | 58  | W         | Negative        | 7          | T3      | N0    | NA                  |
| 808            | 57  | W         | Negative        | 7          | T3      | N0    | 70                  |
| 814            | 67  | W         | Positive        | 7          | T3      | N0    | 65                  |
| 816            | 62  | W         | Negative        | 6          | T2      | N0    | 70                  |
| 823            | 70  | W         | Positive        | 7          | T3      | N0    | 70                  |
| 913            | 57  | W         | Positive        | 7          | T2      | N0    | NA                  |
| 926            | 66  | B         | Negative        | 7          | T3      | N0    | 70                  |
| 938            | 53  | W         | Positive        | 7          | T3      | N0    | 80                  |
| 981            | 48  | H         | Positive        | 7          | T3      | N0    | 75                  |
| 982            | 61  | W         | Positive        | 7          | T3      | N1    | 70                  |
| 986            | 66  | B         | Negative        | 7          | T3      | N0    | 65                  |
| 989            | 58  | W         | Positive        | 7          | T3      | N0    | 70                  |
| 994            | 53  | B         | Positive        | 7          | T3      | N0    | NA                  |
| 995            | 54  | W         | Negative        | 7          | T3      | N0    | 65                  |
| 1009           | 51  | W         | Positive        | 7          | T3      | N0    | 80                  |
| 1048           | 43  | W         | Negative        | 6          | T3      | N0    | 70                  |
| 1070           | 66  | W         | Positive        | 8          | T3      | N0    | 75                  |
| 1138           | 49  | W         | Negative        | 8          | T3      | N1    | 70                  |
| 1164           | 57  | W         | Negative        | 8          | T3      | N0    | 65                  |
| 1203           | 59  | W         | Negative        | 6          | T2      | N0    | NA                  |
| 1273           | 63  | W         | Positive        | 8          | T3      | N0    | 70                  |
| 1355           | 59  | W         | Negative        | 8          | T3      | N0    | 65                  |
| 1422           | 64  | W         | Positive        | 9          | T3      | N0    | 70                  |
| 1437           | 48  | W         | Negative        | 8          | T3      | N0    | 80                  |
| 1508           | 61  | O         | Negative        | 7          | T3      | N0    | 70                  |
| 1518           | 51  | W         | Positive        | 9          | T3      | N1    | 75                  |
| 1538           | 45  | W         | Negative        | 7          | T3      | N0    | 65                  |
| 1665           | 61  | B         | Negative        | 7          | T3      | N1    | 70                  |
| 1704           | 65  | W         | Positive        | 9          | T3      | N1    | 65                  |
| 1756           | 51  | W         | Negative        | 8          | T3      | N0    | 90                  |
| 1863           | 42  | B         | Positive        | 7          | T3      | N0    | 80                  |
| 4441           | 55  | W         | Negative        | 7          | T2      | N0    | NA                  |

\* Data for 78 specimens

**Supplementary Table 3: Junction Specific Primer Sets**

| <sup>A</sup> Patient Bank # | <sup>B</sup> Junctions         | <sup>C</sup> Gene 1 | <sup>D</sup> Gene 2 | <sup>E</sup> Forward       | <sup>F</sup> Reverse      |
|-----------------------------|--------------------------------|---------------------|---------------------|----------------------------|---------------------------|
| 4                           | <i>TMPRSS2-ERG</i>             | chr21:41794326      | chr21:38753597      | GCAGGCTGTGGGGTTTTAT        | ACATCCATGACCCAAAACCA      |
| 10                          | <i>TMPRSS2-ERG</i>             | chr21:41792775      | chr21:38792757      | GGTCAAATGTTGGCTCTG         | AAGGAAACTTTGCAGGTGGA      |
| 70                          | <i>TMPRSS2-MPRL12</i>          | chr21:41783383      | chr17:77283404      | CACCTCATGCCTGAGAAGTGG      | CTTCTCCTGTTGGTCTCCA       |
|                             | <i>HAP1*-TMPRSS2</i>           | chr17:37144837      | chr21:41779769      | GAGAATGGTCTGCCCAAAG        | AGACTGTGCTGAGGAAAGG       |
|                             | <i>TMPRSS2-HAP1*</i>           | chr21:41794230      | chr17:37149531      | CTGACCCCCACTCTGAAGTT       | CCTGTTGGGTGAGGTTTCTC      |
|                             | <i>TMPRSS2-SWI5</i>            | chr21:41779767      | chr9:130085490      | CTCCCTCAAGTGCACTCTAA       | AGTGGCATGATTTGGCTCA       |
| 82                          | <i>EIF3K-TMPRSS2</i>           | chr19:43815389      | chr21:41788584      | GGAATCACCCTGGACACCT        | AGGTCCAATAGCTGGTGGTG      |
|                             | <i>NF1-TMPRSS2</i>             | chr17:26590306      | chr21:41774186      | TCTGACCAGATGACCACAGC       | TCTTCAAGTGGCCAGACT        |
| 134                         | <i>TMPRSS2-ERG</i>             | chr21:41795069      | chr21:38803391      | TACTGCCAGCATCACTCTGG       | CAGCCAAACAAACAACCTGC      |
|                             | <i>ACPP-TMPRSS2</i>            | chr3:133565489      | chr21:41795096      | CCAGGGGCCAGTTTTAGAG        | CCAGAGGCAGTCACAGGATA      |
| 144                         | <i>TMPRSS2-ERG</i>             | chr21:41779065      | chr21:38796877      | AAATGGGTTTCATCAATGTTGTC    | CCGGCCAATAACCTTTTGTG      |
|                             | <i>TMPRSS2-TMPRSS2</i>         | chr21:41789960      | chr21:41781176      | TCATACCTGTGCCAGTCTCG       | AAGGAAAGGAAATCCGTGTG      |
| 199                         | <i>TMPRSS2-ERG</i>             | chr21:41786586      | chr21:38748712      | CATGTAGGTTTCATATTTCCCTTA   | TGGATTTTCAAACCAAGTATCTACC |
| 206                         | <i>TMPRSS2-ERG</i>             | chr21:41793812      | chr21:38763138      | CATGGAGAGTGAGTGGCTGA       | AGTCCAGCCTCATCTCAGA       |
| 214                         | <i>TMPRSS2-ERG</i>             | chr21:41797467      | chr21:38749676      | TGGAGAAATGATCCTCCAGTC      | CTGGCAAGCAAAGATAGGG       |
| 341                         | <i>TMPRSS2-ERG</i>             | chr21:41785537      | chr21:38798302      | AGATGCCTGTCCAGCAAAGT       | TTTCATAAGCATCCACACCG      |
| 353                         | <i>TMPRSS2-ERG</i>             | chr21:41789358      | chr21:38799621      | AGAGCTTTGCTGCCCTTGAT       | AATCCTGCCTCAAGGATTTT      |
| 357                         | <i>TMPRSS2-ERG</i>             | chr21:41794131      | chr21:38797829      | CATGTTGGTAGCTGGGAAT        | CCAGCACTCCATGGAACCTT      |
| 372                         | <i>TMPRSS2-ERG</i>             | chr21:41797622      | chr21:38784847      | TAAGGCCATTGCTTCCAAG        | GGATGCCACGAAGAAATACAG     |
|                             | <i>SLC45A3-ERG</i>             | chr1:203908669      | chr21:38798718      | TTGGTAGGAGCCATGAAAG        | TCTGAGTCGGGGTAGAGTG       |
| 535                         | <i>TMPRSS2-ERG</i>             | chr21:41790462      | chr21:38748584      | ATGGGGGCCCTTAGATACAG       | GGACAGTTAAATGGGCCAAA      |
| 558                         | <i>TDRD7*-TMPRSS2</i>          | chr9:99213679       | chr21:41794880      | CCTCAGGCTTGACAACACAA       | TCGTGTGCTAGGCACACTCT      |
|                             | <i>TMPRSS2-TMPRSS2</i>         | chr21:41771407      | chr21:41780399      | CAACCTCACCAACTCTGTT        | GAGCGACGGACGTTTCTTTA      |
|                             | <i>MX1-TMPRSS2</i>             | chr21:41752881      | chr21:41775109      | GCTGGGTGAGCAGAATAGGAT      | GGGATTGAAGGATGCTGTCT      |
| 580                         | <i>MX1-TMPRSS2</i>             | chr21:41752819      | chr21:41775553      | GCTGGGTGAGCAGAATAGGAT      | GGGATTGAAGGATGCTGTCT      |
| 652                         | <i>TMPRSS2-ERG</i>             | chr21:41792424      | chr21:38775810      | ACTCACACATCGACACTTCCAG     | ATGCCAAATCTGGATAAATGCT    |
|                             | <i>ERG-ERG</i>                 | chr21:38830023      | chr21:38872708      | ATGAGCAATTAGCCCCCTCT       | ATTCAGTTGCTCCTGGGAAG      |
| 675                         | <i>TMPRSS2-ERG</i>             | chr21:41798800      | chr21:38789416      | GAAAGTGGCCTTGCTAGTGG       | TGGCTCTCCACATCTTCT        |
| 682                         | <i>TMPRSS2-ERG</i>             | chr21:41796887      | chr21:38791968      | AGCTTGAGGCACCTGGACT        | CAGGCACCGTTAGGGATAGT      |
| 733                         | <i>TMPRSS2-ERG</i>             | chr21:41794661      | chr21:38816717      | CTTCTGAGCTGGGAGAGCTG       | TCAAGCCAGTTCCAAGACA       |
| 738                         | <i>THSD7A-TMPRSS2</i>          | chr7:11743984       | chr21:41788390      | GTTCTTGTAGTGCATGGCTTATATT  | AGACGACGGGGTGGGAAG        |
| 780                         | <i>TMPRSS2-ERG</i>             | chr21:41792243      | chr21:38787029      | GGTTAAGTCCAGCAGGATGC       | CCCATGTGCTCAATAATTC       |
| 808                         | <i>TMPRSS2-ERG</i>             | chr21:41790468      | chr21:38780232      | ATGGGGGCCCTTAGATACAG       | TATTAGCCTGGTACATGCT       |
|                             | <i>TMPRSS2-ERG</i>             | chr21:41783369      | chr21:38805184      | TCCTACATATGTGCAGTCTAATTC   | GCTCAGAGCACTGGGGACT       |
|                             | <i>SPATA5L1*-TMPRSS2</i>       | chr15:43481074      | chr21:41771055      | GATGGATTTGTAGCACACCAA      | GGGAGTCAAACATCCCAGGT      |
| 814                         | <i>TMPRSS2-ERG</i>             | chr21:41792783      | chr21:38784111      | TCCTTTTCATAGATCCCTGATT     | AGGAACTGAGGAAGAGCAGGTG    |
|                             | <i>MORC3-TMPRSS2</i>           | chr21:36673099      | chr21:41762272      | ACTGAGGAGGCTCTGCTGAC       | CACCCCAAACAACTACCCA       |
| 816                         | <i>TMPRSS2-ERG</i>             | chr21:41791718      | chr21:38797360      | TTTGTCCCTTGTCCCTCTG        | AGAAAACCCAGAAACGCTCA      |
|                             | <i>C1qTNF1-TMPRSS2</i>         | chr17:74540999      | chr21:41791286      | GCACACAGAGGGAAACACA        | TATGGCAGCTGTAGTCAGG       |
|                             | <i>C1qTNF1-TMPRSS2</i>         | chr17:74540985      | chr21:41764084      | TCTTTCTGCCTGTCTGGTC        | TGCAGATTGCAAAGGAAGTG      |
|                             | <i>TMPRSS2-TMPRSS2</i>         | chr21:41764044      | chr21:41796946      | GTTTAGAGCTGCCCTGGAGA       | AGCTTGAGGCACCTGGACT       |
| 981                         | <i>TMPRSS2-ERG</i>             | chr21:41795091      | chr21:38796469      | TACAGGCACCCACCATCATA       | TGGCAGCAGAACAGTATTGG      |
| 989                         | <i>FAM177A1-ERG</i>            | chr14:34584342      | chr21:38756847      | TCCTTTCTCTGTGCCAAA         | CCAGGGCTCTCTAACACTGC      |
| 995                         | <i>TMPRSS2-ERG<sup>1</sup></i> | chr21:41780434      | chr21:38793491      | -                          | CCTTTAAAACCTTATTCTGGCC    |
|                             | <i>TMPRSS2-TMPRSS2</i>         | chr21:41762098      | chr21:41773713      | TCCCATGGAAAACAAAGTGG       | CGGTTTTTCAGAGGGTGTGT      |
|                             | <i>TMPRSS2-TMPRSS2</i>         | chr21:41780464      | chr21:41790293      | TTTTTGAGGGTGATTTCAAGG      | GATAGGCACCAAGTGAAGGA      |
|                             | <i>TMPRSS2-TMPRSS2</i>         | chr21:41786495      | chr21:41773659      | GATGCCAACAGTGTTCCTTAAA     | CGTAGCTGAGGGGAAGGTG       |
|                             | <i>ERG*-ERG</i>                | chr21:38793472      | chr21:38793604      | AGAGCTGGACGTTCAAGTAAATG    | -                         |
| 1164                        | <i>TMPRSS2-ETV5</i>            | chr21:41797113      | chr3:187278460      | CCCCCTTCACTCAATTACC        | CCCTGCAACACCCCTATTTT      |
| 1273                        | <i>ELK4-ERG</i>                | chr1:203858916      | chr21:38746745      | CTGTATGTCTGCCTTAGAAAATAAGA | GTAAGCCAAGATCGCACCAT      |
| 1355                        | <i>TMPRSS2-ERG</i>             | chr21:41788584      | chr21:38799738      | TATAGGCGCCACCATCATA        | TGCCAGCTAGGACAGACAGA      |
| 1422                        | <i>TMPRSS2-ERG</i>             | chr21:41795553      | chr21:38788443      | TCAGCCAAGATTAGGCCACT       | AAGACAACAGAAATGGTTGTTCA   |
| 1538                        | <i>TMPRSS2-ETV4</i>            | chr21:41795742      | chr17:38978855      | GCTGTGTGCCATTGTGAGAT       | CGGGCTCGGTTACATAAGAA      |
| 1665                        | <i>TMPRSS2-ERG</i>             | chr21:41791298      | chr21:38729732      | GCCCGTTTGCCTTATACCTA       | TGAAAACCTGGAGGAAATGC      |
| 1863                        | <i>TMPRSS2-TMPRSS2</i>         | chr21:41761944      | chr21:41777674      | CACCTGACCAGGCCTAGAGGA      | TCAGTCACTGGCTATTGCAG      |
| VCAP                        | <i>TMPRSS2-ERG</i>             | chr21:41779893      | chr21:38798223      | GAGGGCTTAAACAGGAAACAGT     | ACAATTTATAAGCATCCACA      |
|                             | <i>TMPRSS2-TMPRSS2</i>         | chr21:41793823      | chr21:41779387      | GAGTGGCTGAGCCTGAGTTT       | CACGTGGAATGGCTTTTCT       |
| Case 45                     | <i>TMPRSS2-ERG</i>             | chr21:41800806      | chr21:38776561      | CCCCATGTCAGAAAGTTTG        | AGATGGAATCTCAGTCTGTTGC    |
| Case 66                     | <i>TMPRSS2-ERG</i>             | chr21:41795687      | chr21:38804491      | CCAGGAATGGAGCCTGAGT        | CCTTGTGCTCTTTGTGAGTT      |
| Case 77                     | <i>TMPRSS2-ERG</i>             | chr21:41799367      | chr21:38790118      | TGCTCCCTAGCAGTATGACA       | CCAAGGGAAATGATGGTAAGA     |

<sup>1</sup>Complex rearrangement containing a *TMPRSS2-ERG* junction and an *ERG-ERG* junction were discovered with a single set of primers.

A. Patient Bank # indicates the subject identification number used for each patient specimen.

B. Genes involved in rearrangements with 5' rearrangement partner listed first.

C. Genomic position of the rearrangement breakpoint for the 5' partner.

D. Genomic position of the rearrangement breakpoint for the 3' partner.

E,F. Forward and Reverse primer sequences respectively, shown 5' to 3'.

\* Indicates nearest gene when rearrangement occurs in intergenic space
